# Supplementary material for: Integrated analysis of the conformation of a protein-linked spin label by crystallography, EPR and NMR spectroscopy
Source: PubMed Central journal article supplement — J Biomol NMR. 2011 Jan 28;49(2):111–9. doi: 10.1007/s10858-011-9471-y (PMC3042103; doi:10.1007/s10858-011-9471-y), 2011-01-28
Supplement: 10858_2011_9471_MOESM1_ESM.pdf [file 10858_2011_9471_MOESM1_ESM.pdf]

**Table S1:****Data collection statistics**

$$R_{\text{int}} = 100 \frac{\sum_{hkl} \sum_i |I_i(hkl) - \langle I(hkl) \rangle|}{\sum_{hkl} \sum_i I_i(hkl)}$$

| <b>Data statistics</b>        | <b>Cy1R2</b>             | <b>Cy1R2 T55C</b>        | <b>Cy1R2 55R1</b>       |
|-------------------------------|--------------------------|--------------------------|-------------------------|
| Wavelength                    | 0.8 Å                    | 1.0 Å                    | 0.8 Å                   |
| Beamline                      | SLS-PX2                  | SLS-PX2                  | SLS-PX2                 |
| Detector                      | MAR225 CCD               | MAR225 CCD               | MAR225 CCD              |
| Space group                   | P4 <sub>1</sub>          | P4 <sub>1</sub>          | P4 <sub>1</sub>         |
| <i>a</i>                      | 63.412 Å                 | 63.45 Å                  | 63.35 Å                 |
| <i>b</i>                      | 63.412 Å                 | 63.45 Å                  | 63.35 Å                 |
| <i>c</i>                      | 41.315 Å                 | 41.2 Å                   | 40.97 Å                 |
| Resolution                    | 1.21 Å (1.31-<br>1.21 Å) | 1.23 Å (1.33-<br>1.23 Å) | 1.5 Å (1.60-<br>1.50 Å) |
| Reflections<br>measured       | 366600                   | 357078                   | 211815                  |
| Unique<br>reflections         | 48228                    | 48194                    | 25981                   |
| Redundancy                    | 7.3 (6.77)               | 7.41 (6.92)              | 8.07 (7.38)             |
| Completeness(%)               | 96.1 (93.6)              | 96.2 (93.6)              | 99.0 (98.0)             |
| Mean <i>I</i> /σ ( <i>I</i> ) | 20.94 (5.18)             | 27.81 (8.86)             | 31.77 (10.01)           |
| <i>R</i> <sub>int</sub> (%)   | 5.2 (31.20)              | 3.86 (19.99)             | 3.52 (17.28)            |

**Table S2:****Refinement statistics**

| <b>Refinement statistics</b>                           | <b>CylR2</b> | <b>CylR2 T55C</b> | <b>CylR2 55R1</b> |
|--------------------------------------------------------|--------------|-------------------|-------------------|
| <i>R</i> -factor                                       | 13.67%       | 14.80%            | 14.15%            |
| Free <i>R</i> -factor                                  | 16.66%       | 18.4%             | 19.67%            |
| <b>Root mean square deviations from ideal geometry</b> |              |                   |                   |
| Bond lengths                                           | 0.013 Å      | 0.013 Å           | 0.009 Å           |
| Bond angles                                            | 2.5°         | 2.3°              | 2.0°              |
| No. of protein residues                                | 132          | 132               | 131               |
| No. of glycerol molecules                              | 3            | 2                 | 1                 |
| No. of water molecules                                 | 167          | 164               | 129               |
| No. of MTSL ligands                                    | 0            | 0                 | 2                 |
| <b>Ramachandran plot (%)</b>                           |              |                   |                   |
| Favored                                                | 99.22        | 100               | 100               |
| Outliers                                               | 0.78         | 0                 | 0                 |

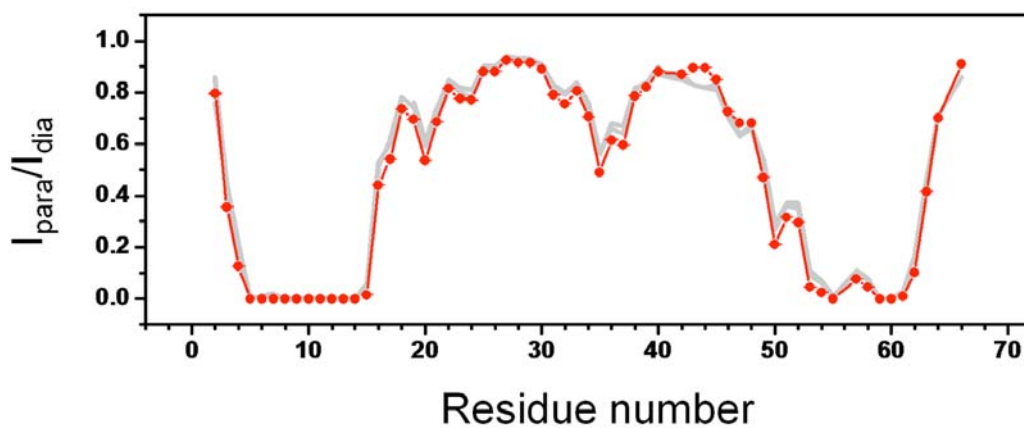

**Figure S1.** Comparison of paramagnetic relaxation enhancement values,  $I_{\text{param}}/I_{\text{dia}}$ , back-calculated from the dimeric crystal structure of CylR2 55R1 (red) and a single subunit of CylR2 55R1 (grey). Due to the  $r^{-6}$  dependence of the PRE and the fact that as the MTSL tag at T55C is not located directly at the dimer interface (Fig. 1a), intensity broadening in CylR2 55R1 is dominated by intramolecular distances.
